# Supplementary material for: Inhibition of vascular adhesion protein‐1 enhances the anti‐tumor effects of immune checkpoint inhibitors
Source: PubMed Central journal article supplement — Cancer Sci. 2021 Mar 18;112(4):1390–401. doi: 10.1111/cas.14812 (PMC8019209; doi:10.1111/cas.14812), 2021-03-18
Supplement: CAS-112-1390-s001.pdf [file CAS-112-1390-s001.pdf]

## Supplementary Figure S1

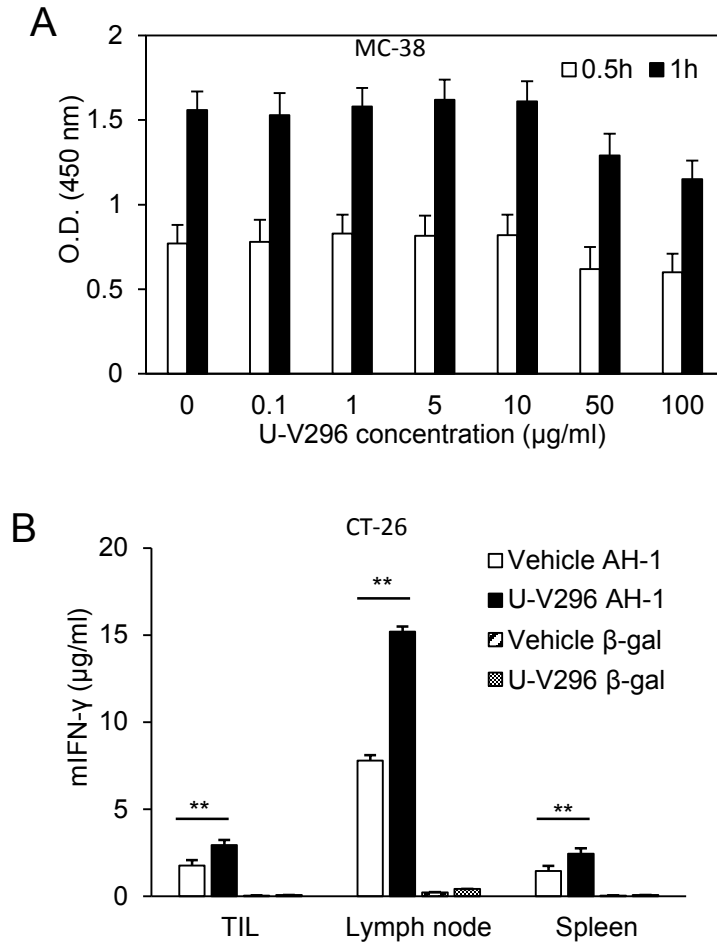

### Supplementary Figure S1.

A, No toxicity of U-V296 on MC-38 tumor cell lines was observed in the WST-1 assay until a concentration of 10  $\mu\text{g/ml}$ . B, Administration of U-V296 improved the activity of CTLs in BALB/c mice bearing CT26 subcutaneous tumors. Specific activation of the CT26 tumor antigen (AH-1) in the cytotoxic T lymphocyte induction assay was observed in CD8<sup>+</sup> T cells sorted from the draining tumors, lymph nodes, and spleens. \* $P < 0.05$ ; \*\* $P < 0.01$ . (related to Fig. 2).

## Supplementary Figure S2

A

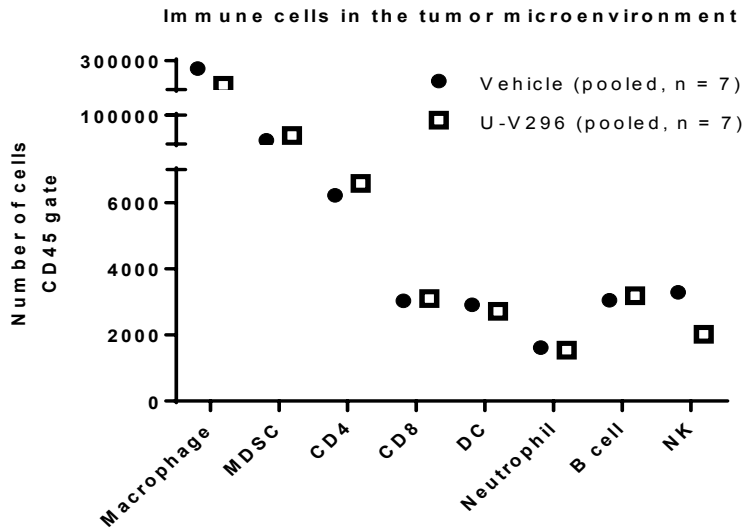

B

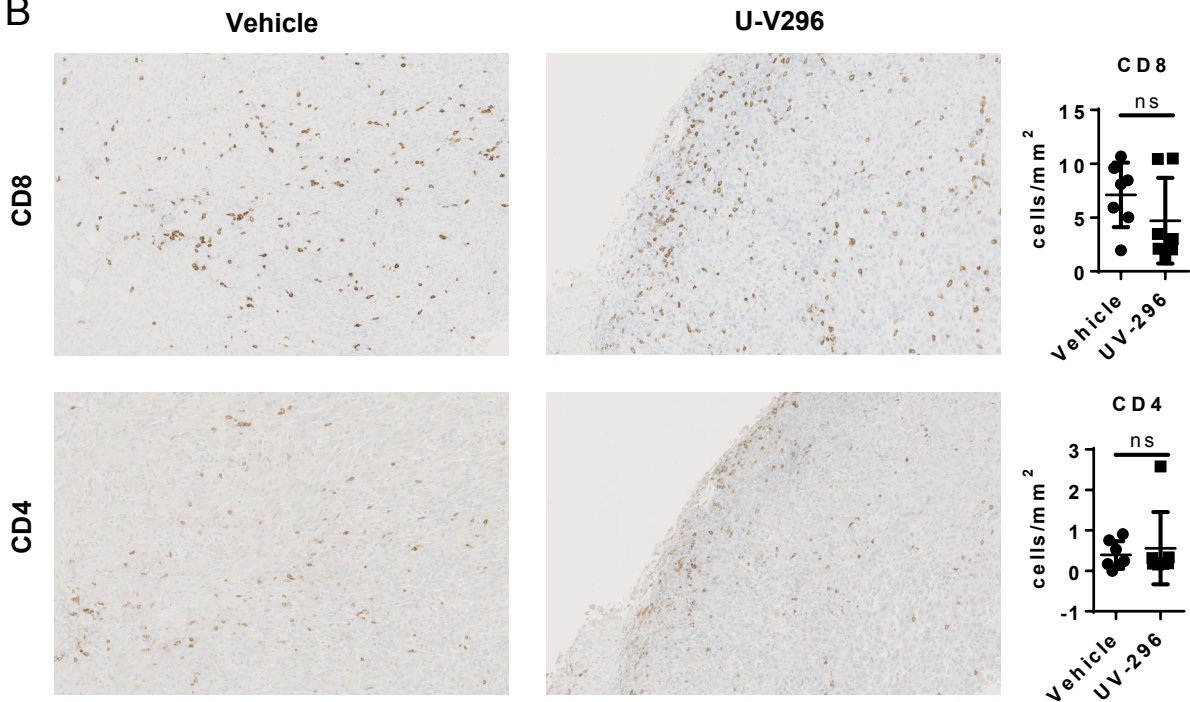

### Supplement Figure S2.

Changes in the immune cell infiltration were not observed upon administration of U-V296, which was analyzed using FACS and immunohistochemistry. A, The number of immune cells in the tumor (pool of seven mice). B, The amount CD4 and CD8 T cells were comparable between the control and treatment groups.

## Supplementary Figure S3

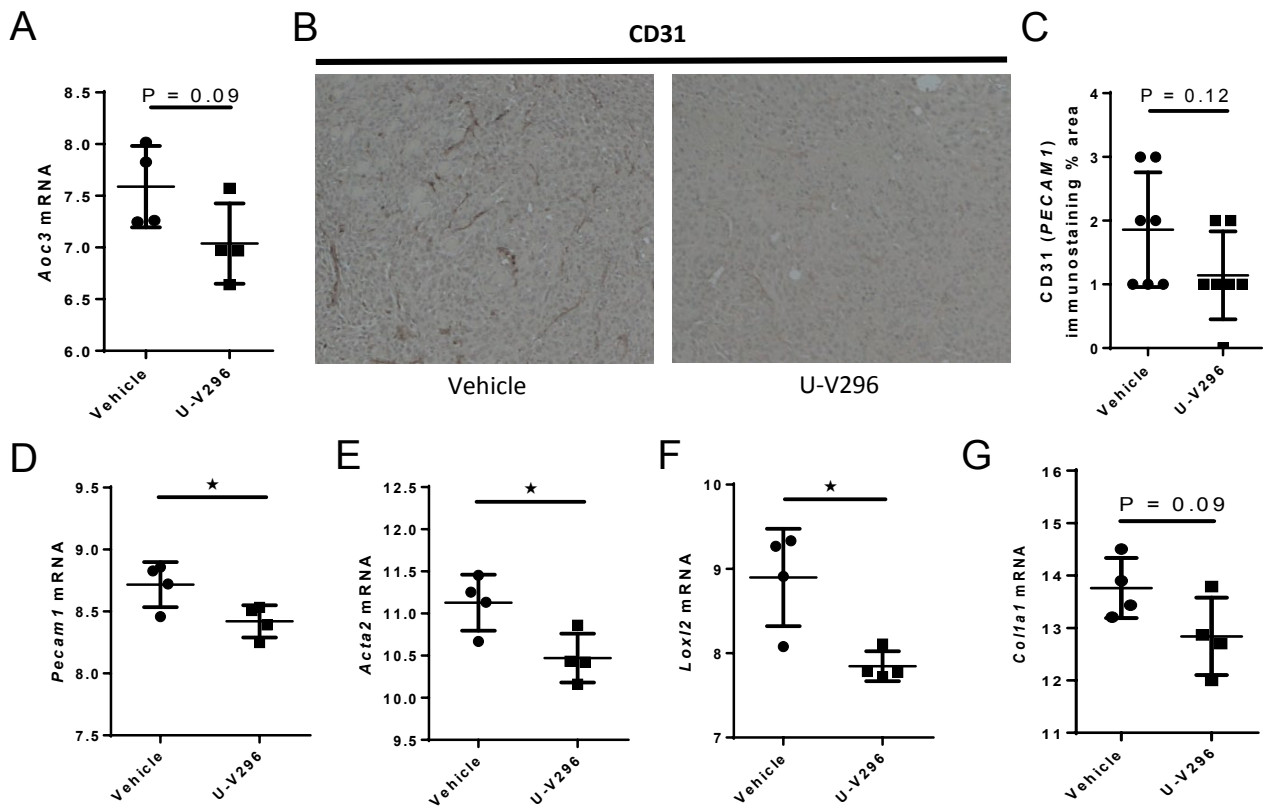

### Supplementary Figure S3.

The effect of VAP-1 inhibition on the expression of VAP-1 (AOC3), angiogenesis, and fibrosis.

**A**, Little or no effect of VAP-1 inhibition on the expression of VAP-1 mRNA (AOC3) in TME. **B-C**, An insignificant decrease in the expression of *Pecam1*, a marker of angiogenesis, was detected through immunohistochemistry. **D**, The expression of *Pecam1* mRNA was decreased after VAP-1 treatment. **E-F**, The expression of *Acta2*, *Lox12*, and *Col1a1*, which are markers of fibrosis, was decreased after inhibition of VAP-1.

## Supplementary Figure 4

A

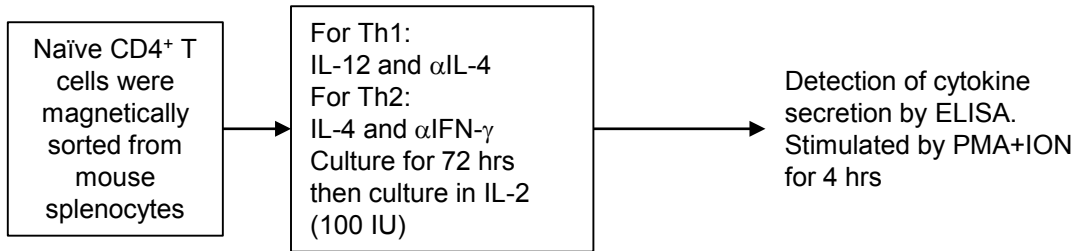

B

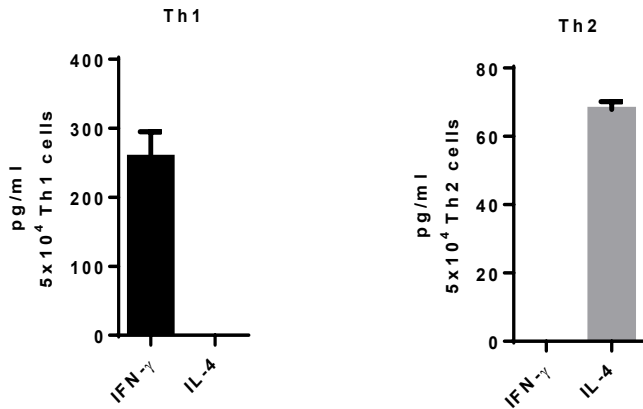

C

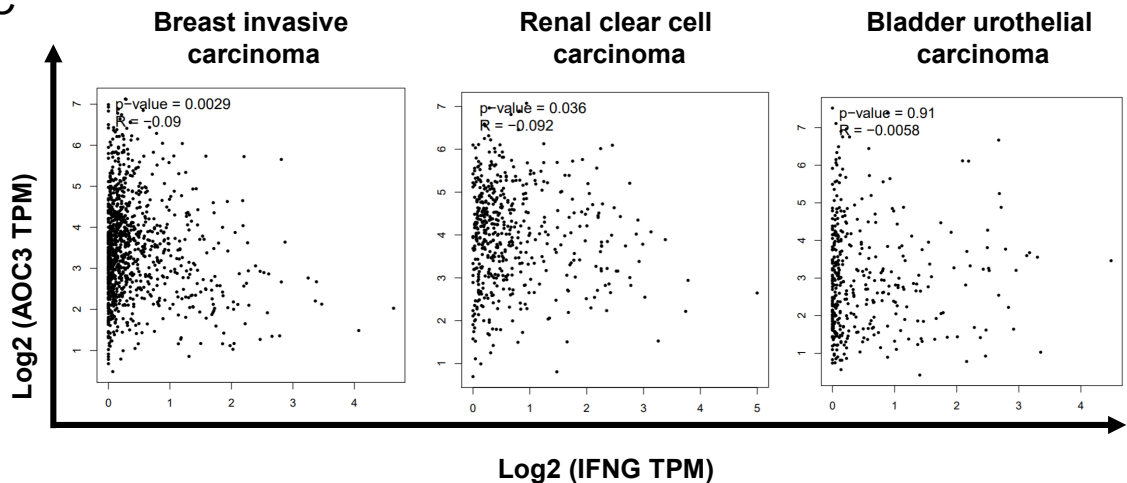

### Supplement Figure S4.

Generation of mouse Th1 and Th2 cells *in vitro*. A, Scheme for the *in vitro* generation of mouse Th1 and Th2 cells. B, Mouse Th1 cells generated *in vitro* producing IFN- $\gamma$  but not IL-4 upon stimulation. Mouse Th2 cells generated *in vitro* producing IL-4 but not IFN- $\gamma$  upon stimulation. C, The expression of AOC3/VAP-1 was non-significant but negatively correlated with that of IFN- $\gamma$  in tumors highly expressing AOC3 (i.e., breast invasive carcinoma (BRCA), renal clear cell carcinoma (KIRC), and bladder urothelial carcinoma (BLCA)).

**Supplementary Figure S5**

**A**

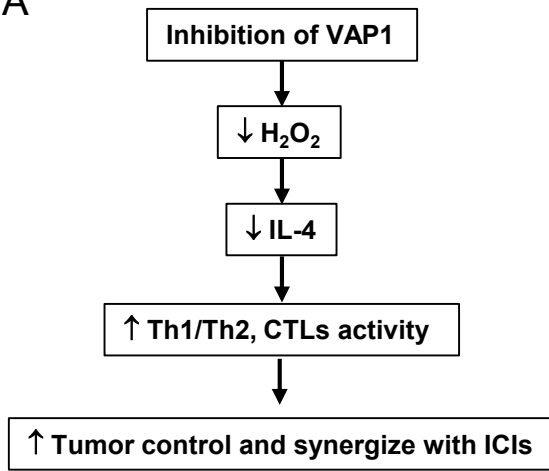

**Supplementary Figure S5.**

Inhibition of VAP-1 reduced the concentration of the highly potent signaling molecule H<sub>2</sub>O<sub>2</sub>, which, at higher concentrations, supported the expression of the Th2- or M2-associated phenotypes possibly influenced by IL-4. Improvement of the Th1/Th2 cytokine balance enhanced the generation of CTLs and synergized with ICIs.
